# Supplementary material for: Prioritizing phylogenetic diversity captures functional diversity unreliably
Source: PubMed Central journal article supplement (PMC6056549; doi:10.1038/s41467-018-05126-3), 2018-07-23
Supplement: 41467_2018_5126_MOESM2_ESM.pdf [file 41467_2018_5126_MOESM2_ESM.pdf]

**Editorial Note:** This manuscript has been previously reviewed at another journal that is not operating a transparent peer review scheme. The manuscript was considered suitable for publication without further review at *Nature Communications*.
